- admixture before, during, and after halothane-oxygen anesthesia in man, *J. Appl. Physiol.* 27: 653, 1969.
4. Bergman, N. A.: Components of the alveolar-arterial oxygen tension difference in anesthetized man, *ANESTHESIOLOGY* 28: 517, 1967.
  5. Chinard, F. P.: In Caro, C. G.: *Advances in Respiratory Physiology*. Baltimore, Williams and Wilkins Co., 1966, pp. 106-147.
  6. Zierler, K. L.: Theoretical basis of indicator-dilution methods for measuring flow and volume, *Circ. Res.* 10: 393, 1962.
  7. Fishman, A. P., Becker, E. L., Fritts, H. W., Jr., and Heinemann, H. O.: Apparent volumes of distribution of water, electrolytes, and hemoglobin within the lung, *Amer. J. Physiol.* 188: 95, 1957.
  8. Kelman, C. R., and Nunn, J. F.: Nomograms for correction of blood  $P_{O_2}$ ,  $P_{CO_2}$ , and pH, and base excess for time and temperature, *J. Appl. Physiol.* 21: 1484, 1966.
  9. Severinghaus, J. W.: Blood gas calculator, *J. Appl. Physiol.* 21: 1108, 1966.
  10. Scholander, P. F.: Analyzer for accurate estimation of respiratory gases in one-half centimeter samples, *J. Biol. Chem.* 167: 235, 1947.
  11. Hedley-White, J., Laver, M. B., and Bendixen, H. H.: The effect of changes in tidal ventilation upon physiological shunting, *Amer. J. Physiol.* 206: 891, 1964.
  12. Chinard, F. P., Enns, T., and Nolan, M. F.: Pulmonary extravascular water volumes from transit time and slope data, *J. Appl. Physiol.* 17: 179, 1962.
  13. Levine, O. R., Mellins, R. B., and Fishman, A. P.: Quantitative assessment of pulmonary edema, *Circ. Res.* 17: 414, 1965.
  14. Lloyd, T. C., and Schneider, A. J. L.: Relation of pulmonary arterial pressure to pressure in the pulmonary venous system, *J. Appl. Physiol.* 27: 489, 1969.

### Pediatrics

**CHILDHOOD ASTHMA** Sixteen children, 8 to 14 years old, with symptomatic childhood bronchial asthma resulting in forced expiratory volumes at one second ( $FEV_1$ ) of less than 65 per cent of vital capacity, were studied.  $FEV_1$  and expiratory peak flow rate (EPFR) were evaluated 5, 15, and 30 minutes after inhalation of 2.5 mg of isoproterenol aerosol. Three test cycles were performed, with five-minute intervals between the 30-minute pulmonary function test and the next inhalation of isoproterenol. The results indicate that  $FEV_1$  increased an average of 57 per cent after the first dose and an average of 79 per cent 15 minutes after the third dose. EPFR increased 31 per cent after the first dose and 54 per cent after the third dose, with peak values occurring at the 5- or the 15-minute test. Heart rate changes showed marked individual variations, with increases of 10 to 60 beats/min, but bore no correlation to the increase in pulmonary function. Repeat doses of isoproterenol aerosol at 35-minute intervals resulted in significantly better  $FEV_1$  and EPFR than a single inhalation. Subsequent inhalations result in further improvement because the initial inhalation has decreased airway obstruction to permit further penetration of the aerosol into the smaller airways. (Featherby, E. A., Weng, T. R., and Levison, H.: *Measurement of Response to Isoprenaline in Asthmatic Children*, *Arch. Dis. Child.* 44: 382 (June) 1969.)
